# Supplementary material
Source: Elsevier journal article supplement (https://www.sciencedirect.com/science/article/pii/S1665268120301885)
Supplement: mmc1 [file S1665268120301885:mmc1.docx]

**Supplemental file 1.1: References of study included in meta-analysis (Table1)**

1. Huang C, Wang Y, Li X, Ren L, Zhao J, Hu Y, et al. Clinical features of patients infected with 2019 novel coronavirus in Wuhan, China. The Lancet. 2020;395(10223):497-506.

2. Guan W-j, Ni Z-y, Hu Y, Liang W-h, Ou C-q, He J-x, et al. Clinical Characteristics of Coronavirus Disease 2019 in China. N. Engl. J. Med. 2020.

3. Wang D, Hu B, Hu C, Zhu F, Liu X, Zhang J, et al. Clinical Characteristics of 138 Hospitalized Patients With 2019 Novel Coronavirus–Infected Pneumonia in Wuhan, China. JAMA. 2020;323(11):1061-9.

4. Zhang J-j, Dong X, Cao Y-y, Yuan Y-d, Yang Y-b, Yan Y-q, et al. Clinical characteristics of 140 patients infected with SARS-CoV-2 in Wuhan, China. Allergy. 2020;75(7):1730-41.

5. Chen G, Wu D, Guo W, Cao Y, Huang D, Wang H, et al. Clinical and immunological features of severe and moderate coronavirus disease 2019. The Journal of Clinical Investigation. 2020 05/01/;130(5):2620-9.

6. Mo P, Xing Y, Xiao Y, Deng L, Zhao Q, Wang H, et al. Clinical characteristics of refractory COVID-19 pneumonia in Wuhan, China. Clin. Infect. Dis. 2020 Mar 16.

7. Qin C, Zhou L, Hu Z, Zhang S, Yang S, Tao Y, et al. Dysregulation of immune response in patients with COVID-19 in Wuhan, China. Clin. Infect. Dis. 2020 Mar 12.

8. Ruan Q, Yang K, Wang W, Jiang L, Song J. Clinical predictors of mortality due to COVID-19 based on an analysis of data of 150 patients from Wuhan, China. Intensive Care Med. 2020 May;46(5):846-8.

9. Wang Z, Yang B, Li Q, Wen L, Zhang R. Clinical Features of 69 Cases with Coronavirus Disease 2019 in Wuhan, China. Clin. Infect. Dis. 2020 Mar 16.

10. Wang L, He W, Yu X, Hu D, Bao M, Liu H, et al. Coronavirus disease 2019 in elderly patients: Characteristics and prognostic factors based on 4-week follow-up. J. Infect. 2020 Mar 30.

11. Zheng F, Tang W, Li H, Huang YX, Xie YL, Zhou ZG. Clinical characteristics of 161 cases of corona virus disease 2019 (COVID-19) in Changsha. Eur. Rev. Med. Pharmacol. Sci. 2020 Mar;24(6):3404-10.

12. Zhou F, Yu T, Du R, Fan G, Liu Y, Liu Z, et al. Clinical course and risk factors for mortality of adult inpatients with COVID-19 in Wuhan, China: a retrospective cohort study. The Lancet. 2020 2020/03/28/;395(10229):1054-62.

13. Colaneri M, Sacchi P, Zuccaro V, Biscarini S, Sachs M, Roda S, et al. Clinical characteristics of coronavirus disease (COVID-19) early findings from a teaching hospital in Pavia, North Italy, 21 to 28 February 2020. Euro surveillance : bulletin Europeen sur les maladies transmissibles = European communicable disease bulletin. 2020;25(16):2000460.

14. Goyal P, Choi JJ, Pinheiro LC, Schenck EJ, Chen R, Jabri A, et al. Clinical Characteristics of Covid-19 in New York City. N. Engl. J. Med. 2020;382(24):2372-4.

15. Zhang J, Wang X, Jia X, Li J, Hu K, Chen G, et al. Risk factors for disease severity, unimprovement, and mortality in COVID-19 patients in Wuhan, China. Clinical microbiology and infection : the official publication of the European Society of Clinical Microbiology and Infectious Diseases. 2020;26(6):767-72.

16. Zhao X-Y, Xu X-X, Yin H-S, Hu Q-M, Xiong T, Tang Y-Y, et al. Clinical characteristics of patients with 2019 coronavirus disease in a non-Wuhan area of Hubei Province, China: a retrospective study. BMC Infect. Dis. 2020 2020/04/29;20(1):311.

17. Du R-H, Liang L-R, Yang C-Q, Wang W, Cao T-Z, Li M, et al. Predictors of mortality for patients with COVID-19 pneumonia caused by SARS-CoV-2: a prospective cohort study. The European respiratory journal. 2020;55(5):2000524.

18. Hong KS, Lee KH, Chung JH, Shin KC, Choi EY, Jin HJ, et al. Clinical Features and Outcomes of 98 Patients Hospitalized with SARS-CoV-2 Infection in Daegu, South Korea: A Brief Descriptive Study. Yonsei Med. J. 2020 May;61(5):431-7.

19. Huang R, Zhu L, Xue L, Liu L, Yan X, Wang J, et al. Clinical findings of patients with coronavirus disease 2019 in Jiangsu province, China: A retrospective, multi-center study. PLoS Negl. Trop. Dis. 2020 May;14(5):e0008280.

20. Zheng Y, Sun LJ, Xu M, Pan J, Zhang YT, Fang XL, et al. Clinical characteristics of 34 COVID-19 patients admitted to intensive care unit in Hangzhou, China. Journal of Zhejiang University. Science. B. 2020 May;21(5):378-87.

21. Deng M, Qi Y, Deng L, Wang H, Xu Y, Li Z, et al. Obesity as a Potential Predictor of Disease Severity in Young COVID-19 Patients: A Retrospective Study. Obesity (Silver Spring, Md.). 2020 Jun 29.

22. Kalyanaraman Marcello R, Dolle J, Grami S, Adule R, Li Z, Tatem K, et al. Characteristics and Outcomes of COVID-19 Patients in New York City's Public Hospital System. medRxiv. 2020:2020.05.29.20086645.

23. Mikami T, Miyashita H, Yamada T, Harrington M, Steinberg D, Dunn A, et al. Risk Factors for Mortality in Patients with COVID-19 in New York City. J. Gen. Intern. Med. 2020 2020/06/30.

24. Wang Y, Liao B, Guo Y, Li F, Lei C, Zhang F, et al. Clinical Characteristics of Patients Infected With the Novel 2019 Coronavirus (SARS-Cov-2) in Guangzhou, China. Open Forum Infectious Diseases. 2020;7(6).

**Supplemental file1.2: Risk of bias of included studies**

| **Study** | **Newcastle–Ottawa Scale** | | | **Overall risk of bias** |
| --- | --- | --- | --- | --- |
|  | **Selection** | **Comparability** | **Exposure** |  |
| Huang et al., Jan 2020 | ** | * | ** | High |
| Guan et al., Feb 2020 | *** | * | * | Low |
| Wang et al., Feb 2020 | *** | * | ** | Moderate |
| Zhang et al., Feb 2020 | ** | * | ** | High |
| Chen et al., Mar 2020 | *** | * | ** | Moderate |
| Mo et al., Mar 2020 | ** | * | * | High |
| Qin et al., Mar 2020 | *** | * | * | Low |
| Ruan et al., Mar 2020 | *** | * | ** | Moderate |
| Wang et al., Mar 2020 | *** | * | * | Low |
| Wang et al., Mar 2020 | ** | * | ** | High |
| Zheng et al., Mar 2020 | *** | * | ** | Moderate |
| Zhou et al., Mar 2020 | **** | * | * | Low |
| Colaneri et al., Apr 2020 | ** | * | * | High |
| Goyal et al., Apr 2020 | *** | * | * | Low |
| Zhang et al., Apr 2020 | *** | * | ** | Moderate |
| Zhao et al, Apr 2020 | ** | * | ** | High |
| Du et al., May 2020 | *** | * | ** | Moderate |
| Hong et al., May 2020 | *** | * | * | Low |
| Huang et. al., May 2020 | ** | * | ** | High |
| Zheng et al., May 2020 | ** | * | * | High |
| Deng et al., Jun 2020 | ** | * | * | High |
| Marcello et al., Jun 2020 | *** | * | ** | Moderate |
| Mikami et al., Jun 2020 | **** | * | * | Low |
| Wang et al., Jun 2020 | ** | * | * | High |
